# Supplementary material for: S1PR1 on tumor-associated macrophages promotes lymphangiogenesis and metastasis via NLRP3/IL-1β
Source: PubMed Central journal article supplement — J Exp Med. 2017 Sep 4;214(9):2695–713. doi: 10.1084/jem.20160392 (PMC5584110; doi:10.1084/jem.20160392), 2017-09-04
Supplement: JEM_20160392_sm.pdf [file JEM_20160392_sm.pdf]

SUPPLEMENTAL MATERIAL

Weichand et al., <https://doi.org/10.1084/jem.20160392>

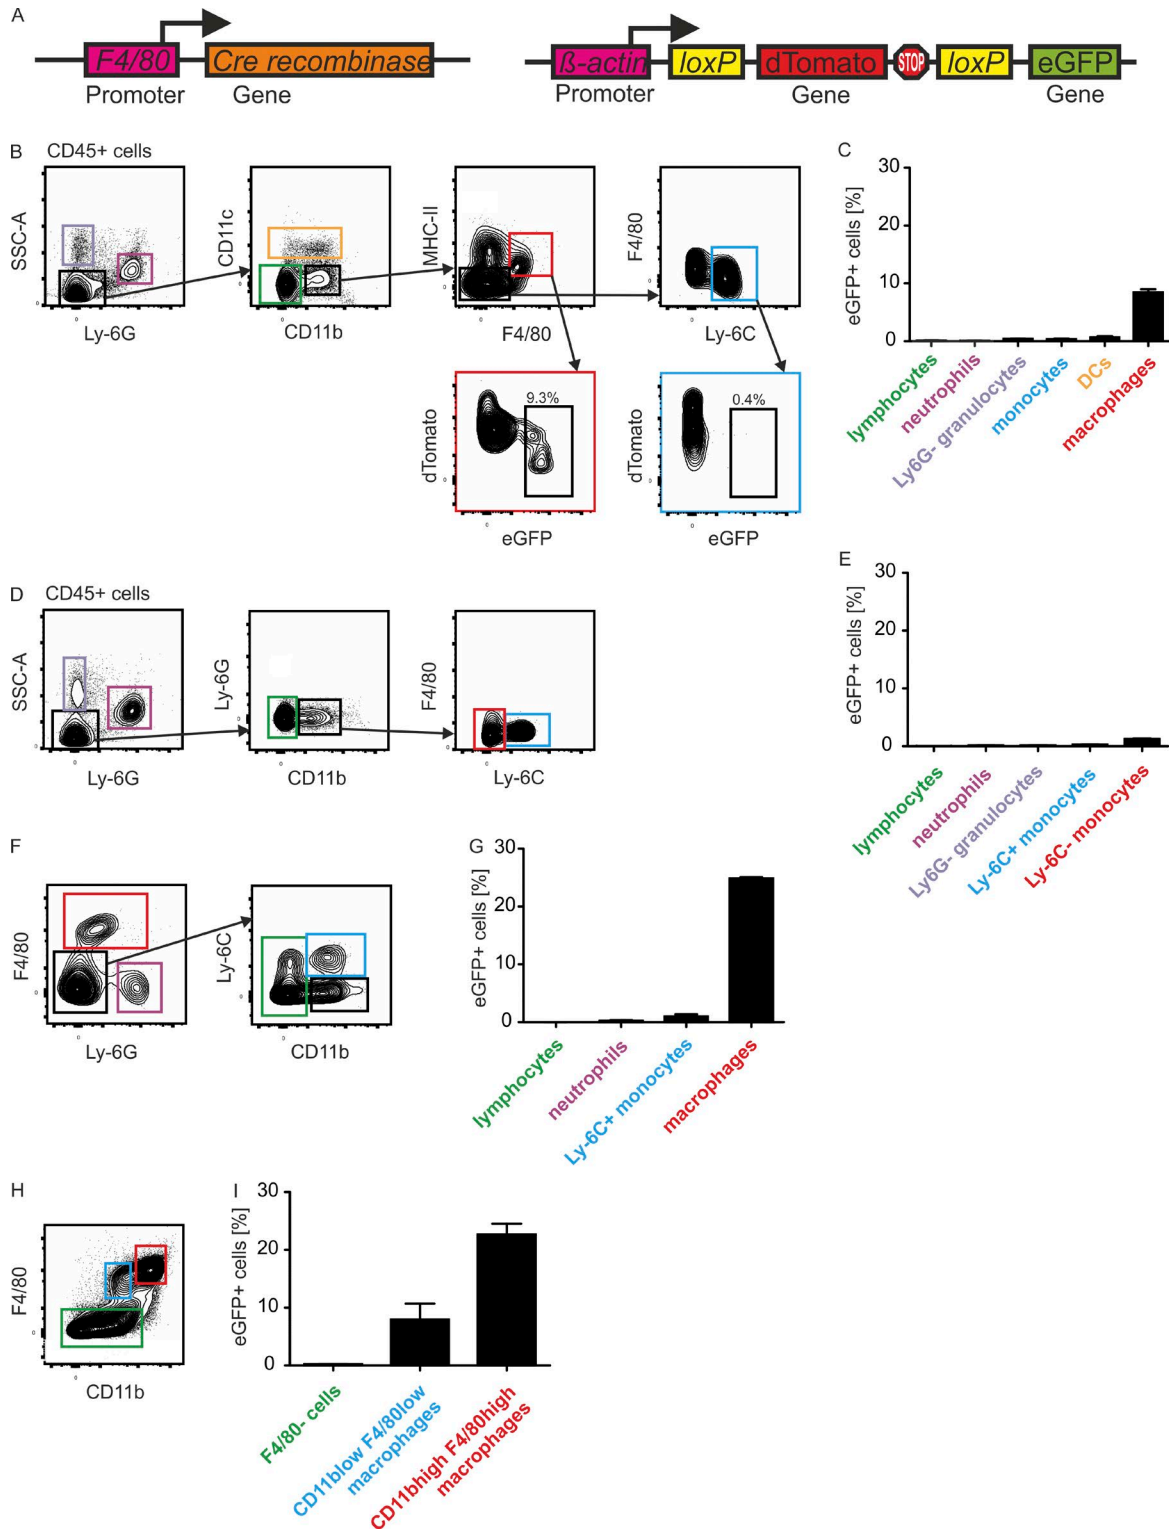

Figure S1. **Characterization of F4/80-Cre mice.** Cre-mediated recombination in immune cells of *F4/80<sup>Cre/+</sup> mT/mG<sup>+/-</sup>* reporter (*mdTomato/meGFP*) mice was characterized by polychromatic flow cytometry. (A) Graphic depiction of transgene expression in *F4/80<sup>Cre/+</sup> mT/mG<sup>+/-</sup>* mice. Immune cell subsets in spleen (B and C), blood (D and E), liver (F and G), and peritoneum (H and I) were analyzed for eGFP expression, indicating recombination. (B, D, F, and H) Contour plots indicate gating strategies to define subpopulations. (C, E, G, and I) Quantification of eGFP<sup>+</sup> cells in immune cell subsets (*n* = 6 individual animals for peritoneal cells; *n* = 3 individual animals for other organs). Data are means + SEM.

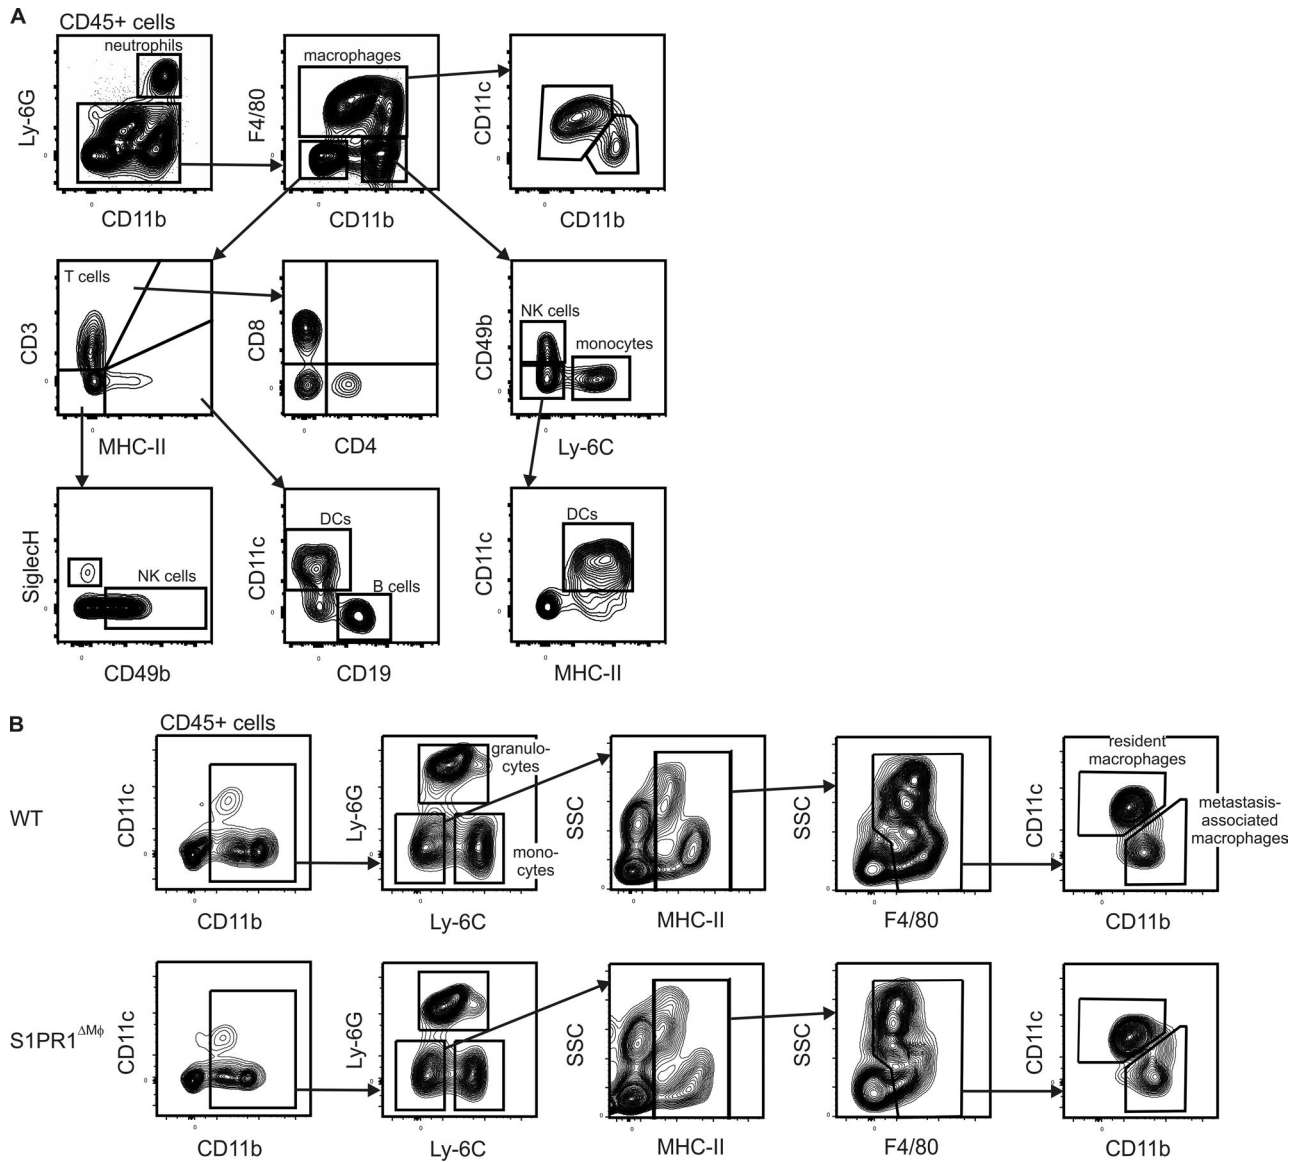

Figure S2. **Identifying immune cell subsets in mammary tumors and lungs of PyMT mice.** Representative contour plots indicate immune cell subset gating in primary mammary carcinomas (A) and lungs (B) of PyMT mice.
